# Supplementary material for: Health Coaching on NexJ Connected Wellness Reduces Pre - Hypertension: A Population Health Study
Source: Research Square preprint supplement (doi:10.21203/rs.3.rs-6874753/v1), 2025-12-16
Supplement: Supplementary file 1 [file 87a5aafdbfe3f976a72d8efe.docx]

| **Activate Onboarding Questionnaire** | | | | | |  | | |  |  | |
| --- | --- | --- | --- | --- | --- | --- | --- | --- | --- | --- | --- |
| **Question** | **Area** | **Question Type** | | **Question** | | | **Helpful Text** | | | **Answer** |
| **General Background** | | |  | |  | | |  | |  |
| 1 | General health | Radio Buttons | | In general, would you say your health is: | | |  | | | □ Poor |
|  |  |  | |  | | |  | | | □ Fair |
|  |  |  | |  | | |  | | | □ Good |
|  |  |  | |  | | |  | | | □ Very Good |
|  |  |  | |  | | |  | | | □ Excellent |
| 2 | Health Priorities | Radio Button | | Which of the following areas are you most interested focusing on during your time in Activate? | | | While you may want to work on multiple areas, please select the one that is the MOST important for you. | | | □ I want to get more physical activity |
|  |  |  | |  | | |  | | | □ I want to eat healthier |
|  |  |  | |  | | |  | | | □ I want to better manage my stress |
|  |  |  | |  | | |  | | | □ I want to reduce or quit smoking |
| 3 | Screening for CVD | Check Box | | Have you ever had any of these events? Please check all that apply | | |  | | | □ Mini stroke |
|  |  |  | |  | | |  | | | □ Stroke |
|  |  |  | |  | | |  | | | □ Heart attack |
|  |  |  | |  | | |  | | | □ No, I have never experienced any of these events |
| 4 | Height | Radio Buttons | | What is your height? Please specify unit of measure first? | | |  | | | □ in |
|  |  |  | |  | | |  | | | □ cm |
| 5 | Height | Number/Text Box Question | |  | | |  | | | Enter height. |
| 6 | Weight | Radio Buttons | | What is your weight? Please specify unit of measure first? | | |  | | | □ lb |
|  |  |  | |  | | |  | | | □ kg |
| 7 | Weight | Number/Text Box Question | |  | | |  | | | Enter weight. |
| **Diet & Nutrition** |  |  | |  | | |  | | |  |
| 8 | Diet and Nutrition | Small Radio Button | | In general, how many servings of fruits and vegetables do you eat in a day? | | | Fruits and vegetables can be canned, fresh, frozen, or 100% natural juice. A serving is…  • 125 ml (½ cup) of vegetables,  • a 125 ml (½ cup) of cooked, leafy vegetables,  • 250 ml (1 cup) of raw leafy vegetables,  • 1 fruit or 125 ml (1/2 cup) of frozen or canned fruit  • 125 ml ½ cup of 100% natural juice | | | Less than 2 |
|  |  |  | |  | | |  | | | 3 |
|  |  |  | |  | | |  | | | 4 |
|  |  |  | |  | | |  | | | 5 |
|  |  |  | |  | | |  | | | 6 |
|  |  |  | |  | | |  | | | 7 or more |
| 9 | Nutrition - Importance | Slider | | How important is it for you to eat healthier? | | |  | | | 0 |
|  |  |  | |  | | |  | | | 1 |
|  |  |  | |  | | |  | | | 2 |
|  |  |  | |  | | |  | | | 3 |
|  |  |  | |  | | |  | | | 4 |
|  |  |  | |  | | |  | | | 5 |
|  |  |  | |  | | |  | | | 6 |
|  |  |  | |  | | |  | | | 7 |
|  |  |  | |  | | |  | | | 8 |
|  |  |  | |  | | |  | | | 9 |
|  |  |  | |  | | |  | | | 10 |
| 10 | Nutrition - Confidence | Slider | | How confident are you that you can eat healthier? | | |  | | | 0 |
|  |  |  | |  | | |  | | | 1 |
|  |  |  | |  | | |  | | | 2 |
|  |  |  | |  | | |  | | | 3 |
|  |  |  | |  | | |  | | | 4 |
|  |  |  | |  | | |  | | | 5 |
|  |  |  | |  | | |  | | | 6 |
|  |  |  | |  | | |  | | | 7 |
|  |  |  | |  | | |  | | | 8 |
|  |  |  | |  | | |  | | | 9 |
|  |  |  | |  | | |  | | | 10 |
| **Physical Activity** |  |  | |  | | |  | | |  |
| 11 | Physical activity | Radio Buttons | | In the past 7 days, how frequently did you engage in moderate-to-vigorous physical activity? | | | How do you typically feel when performing a physical activity? Moderate physical activity is when you tend to break a sweat after performing the activity for about 10 minutes, for example, when carrying light loads, brisk walking, etc. During moderate physical activity, you can carry on a conversation but not sing. Vigorous physical activity is when you tend to break a sweat after performing the activity for about 3-5 minutes for example, heavy lifting, aerobics, etc. During vigorous physical a | | | None |
|  |  |  | |  | | |  | | | 1 Day |
|  |  |  | |  | | |  | | | 2 Days |
|  |  |  | |  | | |  | | | 3 Days |
|  |  |  | |  | | |  | | | 4 Days |
|  |  |  | |  | | |  | | | 5 Days |
|  |  |  | |  | | |  | | | 6 Days |
|  |  |  | |  | | |  | | | 7 Days |
| 12 |  | Number Box | | On those x days, what is the average minutes per day you engaged in physical activity at a moderate-to-vigorous level? | | |  | | | >=150 |
|  |  |  | |  | | |  | | | 60<149 |
|  |  |  | |  | | |  | | | <59 |
| 13 | Physical Activity - Importance | Slider | | How important is it for you to become more physically active? | | |  | | | 0 |
|  |  |  | |  | | |  | | | 1 |
|  |  |  | |  | | |  | | | 2 |
|  |  |  | |  | | |  | | | 3 |
|  |  |  | |  | | |  | | | 4 |
|  |  |  | |  | | |  | | | 5 |
|  |  |  | |  | | |  | | | 6 |
|  |  |  | |  | | |  | | | 7 |
|  |  |  | |  | | |  | | | 8 |
|  |  |  | |  | | |  | | | 9 |
|  |  |  | |  | | |  | | | 10 |
| 14 | Physical Activity - Confidence | Slider | | How confident are you that you can become more physically active? | | |  | | | 0 |
|  |  |  | |  | | |  | | | 1 |
|  |  |  | |  | | |  | | | 2 |
|  |  |  | |  | | |  | | | 3 |
|  |  |  | |  | | |  | | | 4 |
|  |  |  | |  | | |  | | | 5 |
|  |  |  | |  | | |  | | | 6 |
|  |  |  | |  | | |  | | | 7 |
|  |  |  | |  | | |  | | | 8 |
|  |  |  | |  | | |  | | | 9 |
|  |  |  | |  | | |  | | | 10 |
| **Smoking** |  |  | |  | | |  | | |  |
| 15 | Smoking | Radio Buttons | | Have you used any form of tobacco in the past 6 months? | | | Examples of consuming tobacco include cigarettes, chewing tobacco, pipes, e-cigarettes or cigars. | | | □ Yes |
|  |  |  | |  | | |  | | | □ No |
| 16 | Smoking |  | | Have you used any form of tobacco in the past 7 days? | | |  | | | □ Yes |
|  |  |  | |  | | |  | | | □ No |
| 17 | Smoking | Number/Text Box Question | | On average, how many cigarettes/cigars/pipes have you smoked per day over the last 7 days? | | |  | | | 1 |
|  |  |  | |  | | |  | | | 2 |
|  |  |  | |  | | |  | | | 3 |
|  |  |  | |  | | |  | | | 4 |
|  |  |  | |  | | |  | | | 5 |
|  |  |  | |  | | |  | | | 6+ |
| 18 | Smoking - Importance | Slider | | How important is it for you to quit smoking? | | |  | | | 0 |
|  |  |  | |  | | |  | | | 1 |
|  |  |  | |  | | |  | | | 2 |
|  |  |  | |  | | |  | | | 3 |
|  |  |  | |  | | |  | | | 4 |
|  |  |  | |  | | |  | | | 5 |
|  |  |  | |  | | |  | | | 6 |
|  |  |  | |  | | |  | | | 7 |
|  |  |  | |  | | |  | | | 8 |
|  |  |  | |  | | |  | | | 9 |
|  |  |  | |  | | |  | | | 10 |
| 19 | Smoking - Confidence | Slider | | How confident are you that you can quit smoking? | | |  | | | 0 |
|  |  |  | |  | | |  | | | 1 |
|  |  |  | |  | | |  | | | 2 |
|  |  |  | |  | | |  | | | 3 |
|  |  |  | |  | | |  | | | 4 |
|  |  |  | |  | | |  | | | 5 |
|  |  |  | |  | | |  | | | 6 |
|  |  |  | |  | | |  | | | 7 |
|  |  |  | |  | | |  | | | 8 |
|  |  |  | |  | | |  | | | 9 |
|  |  |  | |  | | |  | | | 10 |
